# Supplementary material for: A Study of 1-Phenyl-3-Methyl-4-Trichloroacetyl Pyrazolone-5 as an Extractant for Uranium (VI) From Buffered Solutions
Source: Research Square preprint supplement (doi:10.21203/rs.3.rs-97814/v1), 2020-10-27
Supplement: Supplementary file 1 [file a495236af16b677f91e27025.docx]

**CRediT author statement**

**Victoria Bennett:** Conceptualization, Methodology, Writing- Original Draft Preparation, Supervision

**Bamidele Martin Amos-Tautua:** Visualization Software, Investigation, Writing- Reviewing and Editing,

**Ayasen Jermaine Kemeakegha:**  Formal analysis, Software, Validation
